# Supplementary material for: Expression Analysis of the TdDRF1 Gene in Field-Grown Durum Wheat under Full and Reduced Irrigation
Source: MDPI journal article supplement (doi:10.3390/genes13030555), 2022-03-21
Supplement: s1 [file s1]

## Supplementary Materials

### Supplementary Figure S1: Specific amplification and detection of the three *TdDRF1* transcripts.

On the left: experimental design of TaqMan primers and probes for the specific amplification and detection of the three *TdDRF1* gene transcripts. “R” is the “Reporter” dye attached at the 5′-end of the probe sequence and “Q” is the non-fluorescent “Quencher” on the 3′-end. E1, E2, E3, E4 indicate Exon 1, 2, 3, 4.

On the right: end-point RT-PCRs run on 3% agarose gel confirming the specificity of primers and probes (by the length and further band sequencing). The gel refers to Duilio RI samples collected at T3.

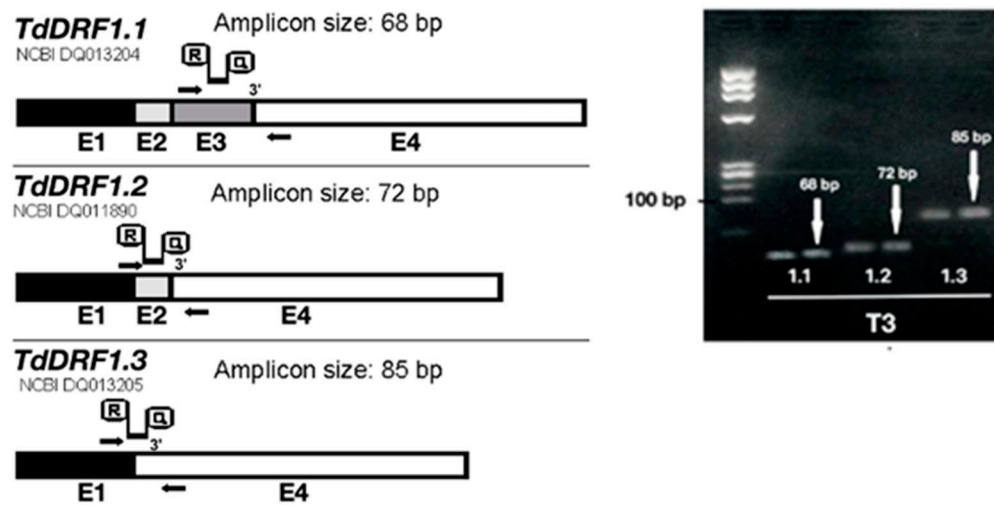

**Supplementary Figure S2:** Schematic representation of the complete procedure of reverse transcription, pre-amplification and qRT-PCR.

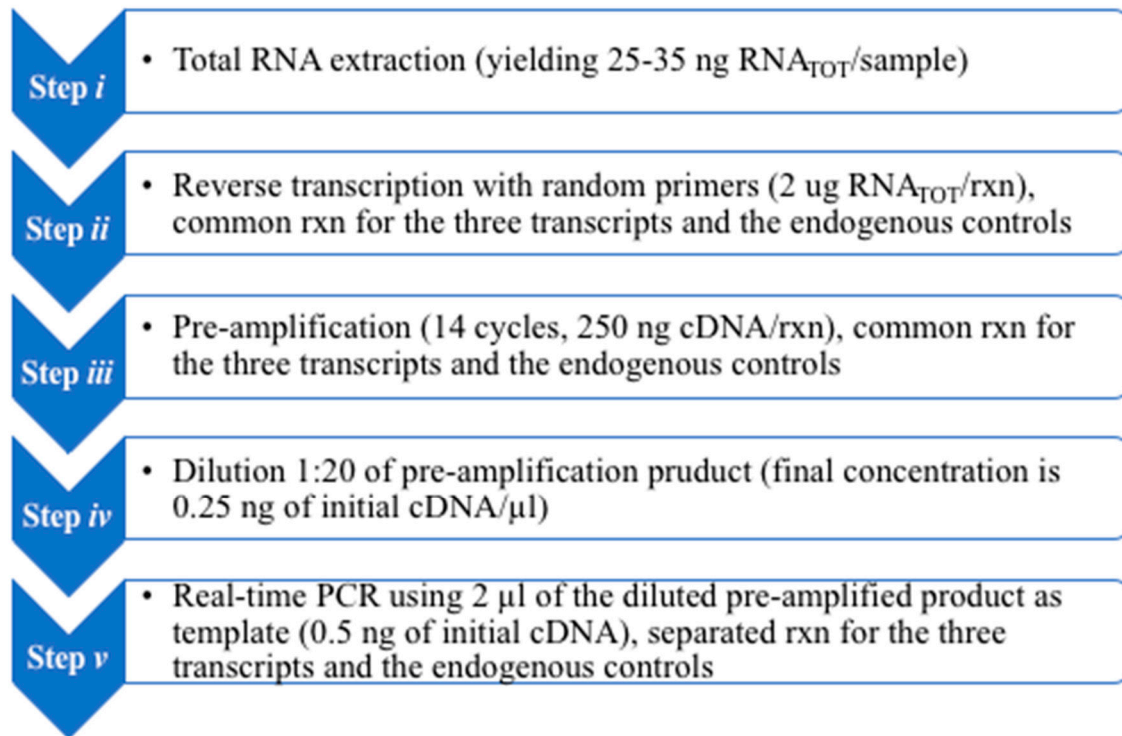

**Supplementary Table S1:** Gene-stability values (*M*) of the analysed reference genes

| Housekeeping gene | <i>M</i> |
|-------------------|----------|
| <i>18S rRNA</i>   | 0.980    |
| <i>Actin</i>      | 0.905    |
| <i>Ta2291</i>     | 0.936    |
| <i>Ta2776</i>     | 0.985    |
| <i>TaSnK1</i>     | 0.802    |
